# Supplementary material
Source: publisher figshare collection journal article supplement (https://sage.figshare.com/ndownloader/files/22659824)
Supplement: Supplementary file 1 [file 22659824]

The following is a transcript of the samples of the speakers included in the qualitative analysis. The first two lines are transcriptions of the utterances in Chinese characters and jyutping respectively. The transcription was produced based on target utterances and does not reflect actual production. The third line is a rough (readable) English translation. Comments are in parenthesis. Ungrammatical utterances, marked with an asterisk (\*), have a fourth line explaining the mistake.

HS1    嗰個人瞓咗覺

*go2 go3 jan4 fan3 zo2 gaau3*

that person fell asleep

嗰個人就唔開心

*go2 go3 jan4 zau6 m4 hoi1sam1*

so that person was unhappy

跟住個人就跌咗

*gan1zyu6 go3 jan4 zau6 dit3 zo2*

and then the person let something fall (intended meaning: fell down)

嗰個人就講

*go2 go3 jan4 zau6 gong2*

then the person said

青蛙你喺邊度

*cing1waa1 nei5 hai2 bin1dou6*

frog where are you

HS2    之後佢好唔開心

*zi1hau6 keoi5 hou2 m4 hoi1sam1*

afterwards he was really unhappy

\*佢快啲著

*keoi5 faai3 di1 zoek3*

he put on (his clothes) quickly

- 快啲 *faai3 di1* “quickly” is usually used in the imperative.
- The target object 衫 *saam1* “clothes” cannot be dropped here.

之後佢就跑去第二個地方叫青蛙

*zi1hau6 keoi5 zau6 paau2 heoi3 dai6 ji6 go3 dei6 fong1 giu3 cing1waa1*

afterwards he ran to another place to call the frogs

佢搵到佢啲青蛙

*keoi5 wan2 dou2 keoi5 di1 cing1waa1*

he found his frogs

HS3 跟住隻狗係咁追隻鹿想攞翻個男仔

*gan1zyu6 zek3 gau2 hai6gam2 zeoi1 zek3 luk2 soeng2 lo2 faan1 go3 naam4zai2*

and then the dog kept on chasing the deer and wanted to take the boy back

跟住隻鹿跑

*gan1zyu6 zek3 luk2 paau2*

and then the deer ran

跟住個男仔跌咗落去

*gan1zyu6 go3 naam4zai2 dit3 zo2 lok3 heoi3*

and then the boy fell down (a cliff)

HS4 \*個 青蛙 出 嚟 呀

*go3 cing1waa1 ceot1 lai4 aa3*

the frog is coming out

· The classifier for frog is 隻 *zek3* not 個 *go3*.

\*佢哋 搵 個 青蛙

· The classifier for frog is 隻 *zek3* not 個 *go3*.

*keoi5dei6 wan2 go3 cing1waa1*

they are looking for the frog

佢哋 去 搵 佢

*keoi5dei6 heoi3 wan2 keoi5*

they are going to look for it

佢哋 一味 搵 同埋 搵

*keoi5dei6 jat1mei2 wan2 tung4maai4 wan2*

they keep on looking and looking for it

佢 跌 咗 呀

*keoi5 dit3 zo2 aa3*

it fell

HS5 \*細路仔 睇 吓 佢 個 青蛙

*sai3lou6zai2 tai2 haa5 keoi5 go3 cing1waa1*

the kid looked at his frog

· The classifier for frog is 隻 *zek3* not 個 *go3*.

\* 佢個青蛙唔喺依度

*keoi5 go3 cing1waa1 m4 hai2 ji1dou6*

his frog was not here

· The classifier for frog is 隻 *zek3* not 個 *go3*.

依個細路仔又講

*ji1go3 sai3lou6zai2 jau6 gong2*

this kid then said

青蛙你喺邊度

*cing1waa1 nei5 hai2 bin1dou6*

frog where are you

HS6 \*男仔同個狗瞓緊覺

*naam4zai2 tung4 go3 gau2 fan3 gan2 gaau3*

boy and the dog are sleeping

· The classifier for dog is 隻 *zek3* not 個 *go3*.

青蛙走囉

*cing1waa1 zau2 lo3*

frog left

\*佢哋搵緊個青蛙

*keoi5dei6 wan2 gan2 go3 cing1waa1*

they are looking for the frog

· The classifier for frog is 隻 *zek3* not 個 *go3*.

\*個 狗 跳 出 嚟

*go3 gau2 tiu3 ceot1 lai4*

the dog jumps out

- The classifier for dog is 隻 *zek3* not 個 *go3*.

|                   |    |       | Guangzhou   | Hong Kong   | United States | Beijing     |
|-------------------|----|-------|-------------|-------------|---------------|-------------|
| Native-likeness   | HK | GZCAN | 5.22 (1.26) | 5.79 (0.61) | 3 (1.58)      | 4.96 (0.95) |
|                   |    | HKCAN | 5.19 (0.85) | 5.8 (0.5)   | 4.4 (0.55)    | 4 (1.73)    |
|                   | HS | GZCAN | 4.53 (1.43) | 5.47 (0.83) | 2.69 (1.55)   | 3.51 (1.79) |
|                   |    | HKCAN | 3.95 (1.1)  | 5.11 (0.94) | 2.84 (1.29)   | 2.9 (1.18)  |
| Comprehensibility | HK | GZCAN | 5.41 (0.96) | 5.7 (0.75)  | 2.4 (0.89)    | 4.12 (1.65) |
|                   |    | HKCAN | 5.23 (0.76) | 5.64 (0.76) | 4.8 (0.84)    | 5.67 (0.58) |
|                   | HS | GZCAN | 4.93 (1.12) | 5.04 (1.25) | 3.94 (1.52)   | 4.25 (1.58) |
|                   |    | HKCAN | 4.43 (1.1)  | 4.77 (1.22) | 3.74 (1.24)   | 3.68 (1.15) |

Supplementary Table 1. Mean scores (*SD*) given to speakers grouped by where they were perceived to be from. The scores were given on a scale of 1–6 (highest = 6).

|                                 | High ratings |           |           | Low ratings   |           |               |
|---------------------------------|--------------|-----------|-----------|---------------|-----------|---------------|
| Speaker                         | HS1          | HS2       | HS3       | HS4           | HS5       | HS6           |
| <b>Scores from GZCAN raters</b> |              |           |           |               |           |               |
| Native-likeness*                | 5            | 5         | 5.56      | 3.05          | 2.53      | 2.37          |
| Comprehensibility *             | 5.29         | 5.35      | 5.67      | 3.68          | 3.21      | 2.89          |
| <i>Place</i>                    |              |           |           |               |           |               |
| Option with the most votes      | Beijing      | Guangzhou | Hong Kong | Beijing       | Beijing   | Guangzhou     |
| % of votes                      | 33           | 58        | 71        | 50            | 61        | 35            |
| <b>Scores from HKCAN raters</b> |              |           |           |               |           |               |
| Native-likeness *               | 5.1          | 4.7       | 5.3       | 2.5           | 2.63      | 2.6           |
| Comprehensibility *             | 5.03         | 5.3       | 5.5       | 2.77          | 2.7       | 2.83          |
| <i>Place</i>                    |              |           |           |               |           |               |
| Option with the most votes      | Guangzhou    | Guangzhou | Hong Kong | United States | Guangzhou | United States |
| % of votes                      | 37           | 41        | 93        | 73            | 43        | 67            |
| <b>Linguistic background</b>    |              |           |           |               |           |               |
| Gender                          | Male         | Female    | Female    | Male          | Male      | Female        |

|                                                  |                |                |               |                |                  |                |
|--------------------------------------------------|----------------|----------------|---------------|----------------|------------------|----------------|
| Birthplace                                       | Mainland China | United States  | United States | United States  | United States    | Mainland China |
| Age of testing                                   | 7;4            | 10;11          | 8;1           | 6;11           | 7;0              | 9;2            |
| Age of arrival in the United States              | 1;9            | NA             | NA            | NA             | NA               | 5;6            |
| Length of residence in the United States (years) | 5.5            | 10.9           | 8.1           | 6.9            | 7.0              | 3.6            |
| Visits to China                                  | 0              | 1              | 2             | 0              | 1                | 0              |
| Can read/write Chinese words                     | Yes            | Yes            | Yes           | No             | No               | Yes            |
| Other languages spoken                           | Mandarin       | Mandarin       | -             | -              | -                | Spanish        |
| Father's place of birth                          | Mainland China | Mainland China | Hong Kong     | Mainland China | -                | Mainland China |
| Mother's place of birth                          | Mainland China | Mainland China | Hong Kong     | Mainland China | -                | Mainland China |
| Father's occupation                              | -              | -              | Driver        | Waiter         | -                | Chef           |
| Mother's occupation                              | -              | -              | Secretary     | Caretaker      | Community worker | Cashier        |
| Father's education                               | "None"         | "None"         | Secondary     | Secondary      | -                | Vocational     |
| Mother's education                               | "None"         | "None"         | Secondary     | Secondary      | -                | Vocational     |
| Father's self-rated Cantonese listening *        | 6              | 6              | 6             | 6              | -                | 6              |

|                                                 |    |         |         |     |         |    |
|-------------------------------------------------|----|---------|---------|-----|---------|----|
| Father's self-rated Cantonese speaking *        | 6  | 6       | 6       | 6   | -       | 6  |
| Mother's self-rated Cantonese listening *       | 6  | 6       | 6       | 6   | -       | 6  |
| Mother's self-rated Cantonese speaking *        | 6  | 4       | 6       | 6   | -       | 5  |
| Father's percentage of Cantonese use with child | 75 | 75      | 100     | 100 | 100     | 75 |
| Child's percentage of Cantonese use with father | 75 | 75      | 75      | 100 | 100     | 75 |
| Mother's percentage of Cantonese use with child | 75 | 25      | 100     | 100 | 100     | 25 |
| Child's percentage of Cantonese use with mother | 75 | 25      | 75      | 100 | 100     | 25 |
| Siblings                                        | 0  | 1 older | 1 older | -   | 1 older | 0  |
| Percentage of Cantonese use between siblings    | NA | 50      | 75      | 75  | 75      | NA |



|                                                        |             |              |              |                           |             |             |
|--------------------------------------------------------|-------------|--------------|--------------|---------------------------|-------------|-------------|
| Other adults living in the same household              | NA          | NA           | Grandparents | NA                        | -           | NA          |
| Percentage of Cantonese used to teach in school        | 0           | 0            | 0            | -                         | 0           | 0           |
| Percentage of Cantonese used with classmates in school | 0           | 0            | 0            | -                         | 0           | 0           |
| Attending extracurricular Chinese classes              | In Mandarin | In Cantonese | In Cantonese | In Cantonese and Mandarin | In Mandarin | In Mandarin |
| <i>Percentage of Cantonese used when...</i>            |             |              |              |                           |             |             |
| Playing sports                                         | 75          | 0            | 50           | -                         | -           | 0           |
| Talking to friends                                     | 25          | 0            | 0            | -                         | 0           | 0           |
| Watching TV                                            | 75          | 50           | 50           | -                         | 25          | 25          |
| Using the computer                                     | 50          | 0            | 0            | -                         | 0           | 0           |

---

Supplementary Table 2. Scores and language background of the HSs included in the qualitative analysis. ‘NA’ means not applicable. ‘-’ means data is not available, as in neither the participant nor their parent(s) provided a response.

\* Highest = 6, lowest = 1

|                          | HS1 | HS2 | HS3 | HS4 | HS5 | HS6 |
|--------------------------|-----|-----|-----|-----|-----|-----|
| No. mistakes             | 0   | 2   | 0   | 2   | 2   | 3   |
| Word count               | 31  | 32  | 29  | 29  | 30  | 24  |
| Words per second         | 2.4 | 3.1 | 2.9 | 2.2 | 2.7 | 2.7 |
| Mean length of utterance | 6.2 | 8   | 9.7 | 5.8 | 7.5 | 6   |

Supplementary Table 3. Number of words and mistakes in the samples of the HSs included in the qualitative analysis

| Speaker | Target word | Speakers' pronunciation (IPA)     | Target pronunciation (IPA)       | (jyutping)   | Where speakers deviated |
|---------|-------------|-----------------------------------|----------------------------------|--------------|-------------------------|
| HS4     | 佢           | k <sup>hw</sup> ɔ:i <sup>23</sup> | k <sup>h</sup> ɵy <sup>23</sup>  | <i>keoi5</i> | vowel                   |
|         | 娃           | wa: <sup>21</sup>                 | wa: <sup>55</sup>                | <i>waal</i>  | tone                    |
|         | 味           | mei <sup>21</sup>                 | mei <sup>25</sup>                | <i>mei2</i>  | tone                    |
| HS5     | 佢           | ku:y <sup>23</sup>                | k <sup>h</sup> ɵy <sup>23</sup>  | <i>keoi5</i> | vowel                   |
|         | 個           | kə <sup>33</sup>                  | kɔ: <sup>33</sup>                | <i>go3</i>   | vowel                   |
|         | 青           | tɕ <sup>h</sup> ɪŋ <sup>33</sup>  | tɕ <sup>h</sup> ɪŋ <sup>55</sup> | <i>cing1</i> | consonant + tone        |
| HS6     | 狗           | kɐu <sup>55</sup>                 | kɐu <sup>25</sup>                | <i>gau2</i>  | tone                    |
|         | 娃           | k <sup>w</sup> a: <sup>55</sup>   | wa: <sup>55</sup>                | <i>waal</i>  | consonant               |
|         | 條           | t <sup>h</sup> ia:u <sup>21</sup> | t <sup>h</sup> i:u <sup>21</sup> | <i>tiu4</i>  | vowel                   |

Supplementary Table 4. List of words that the HSs in the qualitative analysis produced in a way differing from typical Cantonese pronunciation. Tones 1–6 of jyutping described using Chao tone letters (in numeral equivalents) are 55/53 (high-level/high-falling), 25 (high-rising), 33 (mid-level), 21 (low-falling), 23 (low-rising), 22 (low-level).
